# Supplementary material for: From monsoon to marine productivity in the Arabian Sea: insights from glacial and interglacial climates
Source: Copernicus journal article supplement (doi:10.5194/cp-13-759-2017), 2017-07-04
Supplement: Supplementary file 1 [file cp-13-759-2017-supplement.zip]

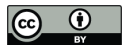

## *Supplement of*

# **From monsoon to marine productivity in the Arabian Sea: insights from glacial and interglacial climates**

**Priscilla Le Mézo et al.**

*Correspondence to:* Priscilla Le Mézo (priscilla.le-mezo@lsce.ipsl.fr)

- cp-13-759-2017-supplement-title-page.pdf
- for\_paper
  - Arabian\_Sea\_masks.nc
  - Barycenter\_SLP\_Depression\_Indian\_African\_Monsoon\_JJAS\_1M.nc
  - CTRL
    - \* piControl2\_26000101\_26991231\_JJAS\_intNO3.nc
    - \* piControl2\_26000101\_26991231\_JJAS\_intTPP.nc
    - \* piControl2\_26000101\_26991231\_SE\_insolation.nc
    - \* piControl2\_26000101\_26991231\_SE\_mean\_TT.nc
    - \* piControl2\_26000101\_26991231\_SE\_mld.nc
    - \* piControl2\_26000101\_26991231\_SE\_sst.nc
    - \* piControl2\_26000101\_26991231\_SE\_surface\_winds.nc
    - \* piControl2\_26000101\_26991231\_SE\_wind\_stress.nc
  - EH
    - \* CM5AEH01\_22500101\_23491231\_JJAS\_intNO3.nc
    - \* CM5AEH01\_22500101\_23491231\_JJAS\_intTPP.nc
    - \* CM5AEH01\_22500101\_23491231\_SE\_insolation.nc
    - \* CM5AEH01\_22500101\_23491231\_SE\_mean\_TT.nc
    - \* CM5AEH01\_22500101\_23491231\_SE\_mld.nc
    - \* CM5AEH01\_22500101\_23491231\_SE\_wind\_stress.nc
  - LGM
    - \* lgm11c3\_31000101\_31991231\_JJAS\_intTPP.nc
    - \* lgm11c3\_31000101\_31991231\_SE\_wind\_stress.nc
  - MH
    - \* CM5H6KO2\_25010101\_26001231\_JJAS\_intTPP.nc
    - \* CM5H6KO2\_25010101\_26001231\_SE\_wind\_stress.nc

- MIS3
  - \* MIS3mB6\_27000101\_27991231\_JJAS\_intTPP.nc
  - \* MIS3mB6\_27000101\_27991231\_SE\_wind\_stress.nc
- MIS4D
  - \* MIS4dB6\_31000101\_31991231\_JJAS\_intTPP.nc
  - \* MIS4dB6\_31000101\_31991231\_SE\_wind\_stress.nc
- MIS4F
  - \* MIS4fB6\_31000101\_31991231\_JJAS\_intTPP.nc
  - \* MIS4fB6\_31000101\_31991231\_SE\_wind\_stress.nc
- MIS4M
  - \* MIS4mB6\_31000101\_31991231\_JJAS\_intTPP.nc
  - \* MIS4mB6\_31000101\_31991231\_SE\_wind\_stress.nc
- README
- SLPa\_CTRL\_EH.nc
- Time\_series\_1M\_Arabian\_Sea\_whole\_column\_new\_sim\_31\_27\_MBG.nc
- Time\_series\_1M\_Arabian\_Sea\_whole\_column\_new\_sim\_31\_27\_winds.nc
- Time\_series\_1M\_Northern\_Arabian\_Sea\_whole\_column\_new\_sim\_31\_27\_MBG.nc
- Tropospheric\_temperature\_gradients.nc
- ferret.jnl

The copyright of individual parts of the supplement might differ from the CC BY 3.0 License.
